# Supplementary material
Source: PubMed Central journal article supplement (PMC7901833)
Supplement: NIHMS1668253-supplement-Supplementary_Material.pdf [file NIHMS1668253-supplement-Supplementary_Material.pdf]

**SUPPLEMENTAL MATERIAL**

**Supplemental Table S1.** Role of CKD in COVID-19-associated in-hospital mortality: multivariate analysis

| Patient characteristics | OR (95% CI)    | p-value |
|-------------------------|----------------|---------|
| CKD vs. non-CKD         | 1.4 (1.1-1.9)  | 0.012   |
| Male sex                | 1.2 (1.1-1.4)  | 0.03    |
| Black race              | 0.8 (0.6-1.03) | 0.08    |
| Hispanic ethnicity      | 0.7 (0.6-0.9)  | 0.001   |
| Hypertension            | 1.1 (0.9-1.3)  | 0.17    |
| Diabetes mellitus       | 1.3 (1.1-1.5)  | 0.005   |
| Asthma                  | 0.7 (0.5-0.9)  | 0.005   |
| COPD                    | 1.6 (1.2-2.1)  | 0.002   |

Logistic regression was used to estimate the association between the presence of pre-existing chronic kidney disease (CKD) and in-hospital death. Co-variates included in the model were sex, race, ethnicity, and the presence of co-morbid conditions.

OR, odds ratio. CI, confidence interval. COPD, chronic obstructive pulmonary disease.

**Supplemental Figure S1.** In hospital mortality in COVID-19 patients with pre-existing CKD by CKD stages

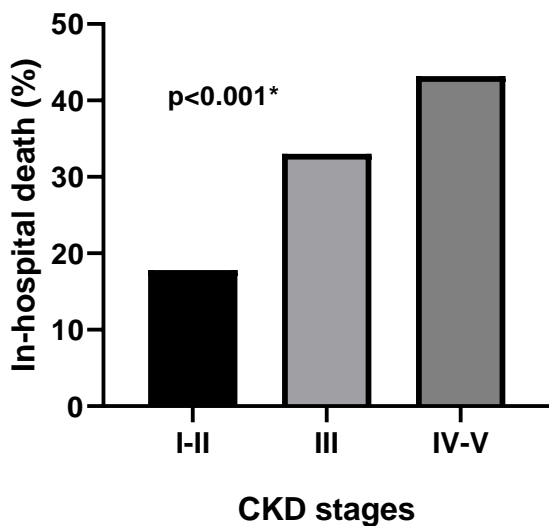

\* Chi-square test for differences between three groups.
